# Supplementary material for: Gold-conjugated Nanobodies for Targeted Imaging using High-resolution Secondary Ion Mass Spectrometry
Source: Preprints.org preprint supplement (doi:10.20944/preprints202105.0687.v1), 2021-05-28
Supplement: Supplementary file 1 [file supplementary]

## Supplementary Information

### Gold-conjugating nanoprobe for targeted molecular imaging using high-resolution secondary ion mass spectrometry

Paola Agui-Gonzalez<sup>1,2</sup>, Tal M. Dankovich<sup>2</sup>, Felipe Opazo<sup>1,2,3</sup>, Silvio O. Rizzoli<sup>1,2\*</sup>, and Nhu T. N. Phan<sup>1,2,4\*</sup>

1 Center for Biostructural Imaging of Neurodegeneration, University Medical Center Göttingen, von-Siebold-Straße 3a, 37075 Göttingen (Germany)

2 Department of Neuro- and Sensory Physiology, University Medical Center Göttingen, Humboldtallee 23, 37073 Göttingen (Germany)

3 NanoTag Biotechnologies GmbH, Rudolf Wissell-Str. 28a, 37079 Göttingen (Germany)

4 Department of Chemistry and Molecular Biology, University of Gothenburg, Kemivägen 10, 41296, Gothenburg (Sweden)

\* Correspondence: thi.phan@med.uni-goettingen.de (nhu.phan@chem.gu.se)

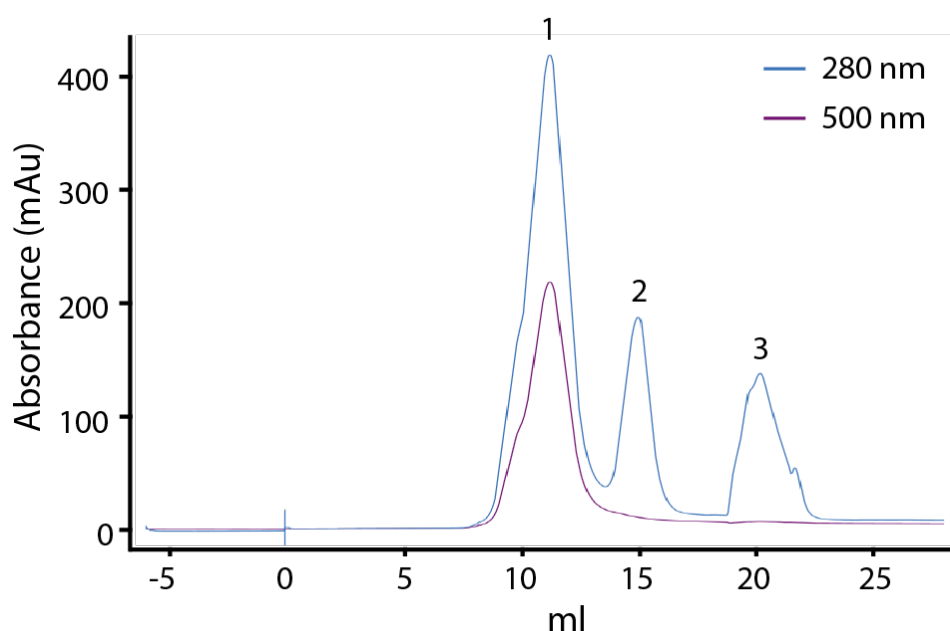

**Figure S1.** Size-Exclusion Chromatography (SEC) of the nanobody-gold conjugation. Superdex-75 increase column was used to separate 3 nm gold NPs conjugated to anti-mouse nanobody. Peak 1 is the conjugated nanobody and gold NPs, which show their absorbances at the wavelengths of 280 nm and 500 nm, respectively. Peak 2 corresponds to the unconjugated nanobody absorbing at 280 nm. And peak 3 corresponds to a small protein fraction after cleaving the His-Tag from the nanobody.

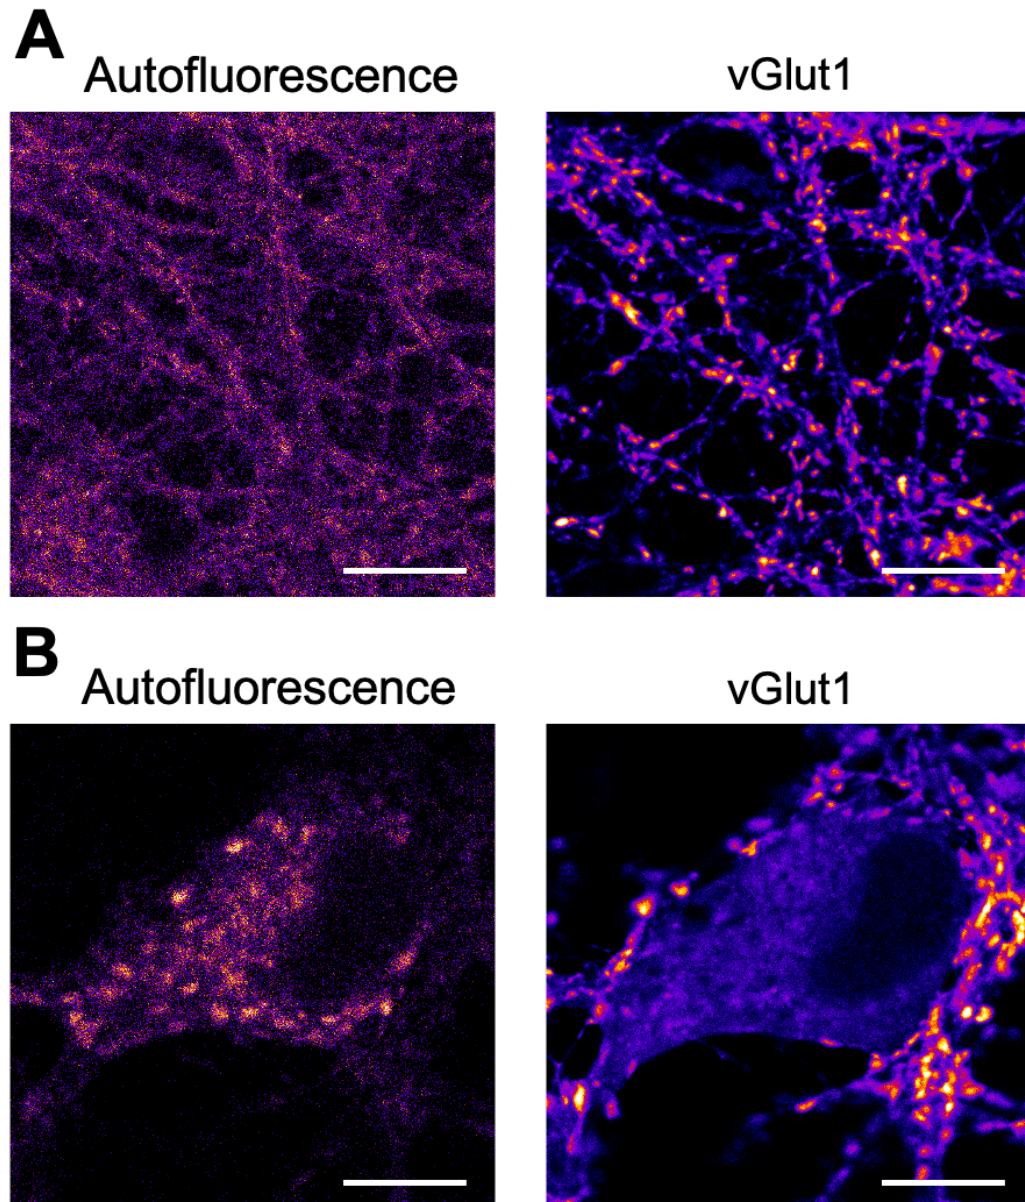

**Figure S2.** Confocal fluorescence images of vesicular glutamate transporter (vGlut1) primary mouse antibody in hippocampal neurons, which is then revealed by Abberior STAR 580-anti-mouse secondary antibody. **A.** vGlut localizes as “hot spots” along the neurites. **B.** vGlut localizes dominantly in the neurites compared to the cell body. Scale bars are 10  $\mu\text{m}$ .

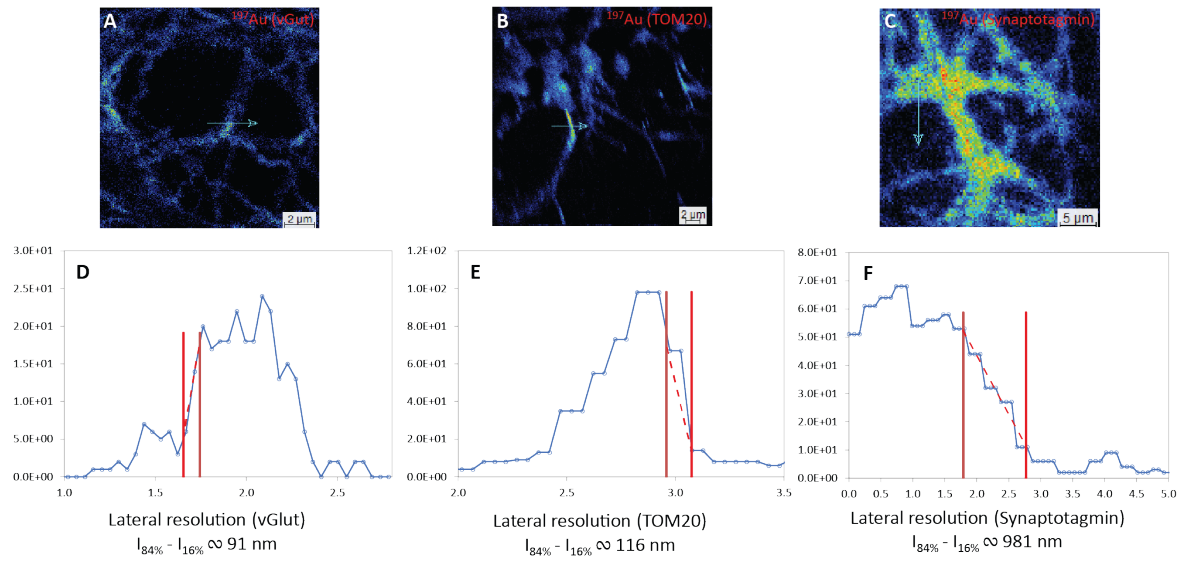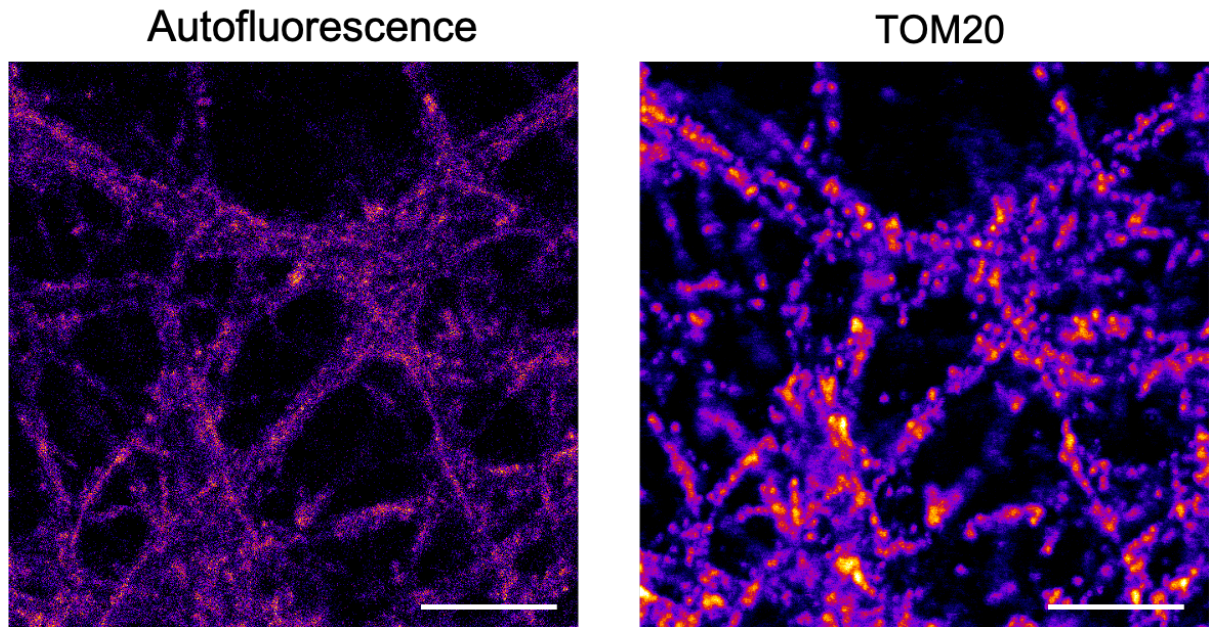

**Figure S4.** Confocal images of mitochondrial marker TOM20 primary mouse antibody in hippocampal neurons, which is then revealed by Cy5-anti-mouse secondary antibody. Left to right: Autofluorescence and TOM20. Scale bars are 10  $\mu\text{m}$ .

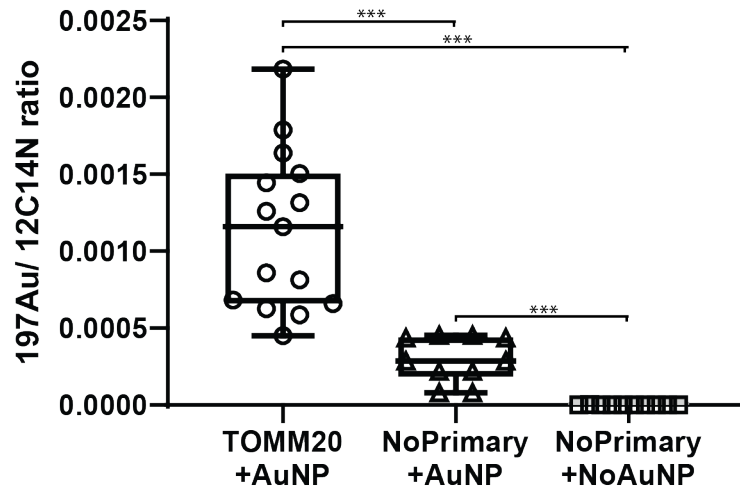

**Figure S5.** The chart shows a significantly higher signal of  $^{197}\text{Au}$  signal in the neuronal cells labeled with TOM20 plus Au anti-mouse nanoprobe compared to the negative control cells labeled with Au anti-mouse antibody in the absence of primary antibody, and negative control cells labeled with neither primary antibody nor Au anti-mouse nanoprobe. The statistical analysis was performed by the Kolmogorov-Smirnov tests ( $p < 0.0001$ ) ( $n = 15$  for labelled cells,  $n = 10$  for control cells). Error bars represent SEM.
